# Supplementary material for: Evaluation of the added value of 1H-magnetic resonance spectroscopy for the diagnosis of pediatric brain lesions in clinical practice
Source: PubMed Central journal article supplement — Neurooncol Pract. 2017 May 13;5(1):18–27. doi: 10.1093/nop/npx005 (PMC5909808; doi:10.1093/nop/npx005), 2017-05-13
Supplement: npx005_suppl_supplemental_data.pdf [file npx005_suppl_supplemental_data.pdf]

## Supplementary Material

### Supplementary Data 1: Tumour Board Diagnoses

| <b>Tumour Board Diagnosis</b>  | <b>Number</b> | <b>Histopathological diagnosis available</b> | <b>Central Histopathology Review requested</b> | <b>Histopathology inconclusive</b> |
|--------------------------------|---------------|----------------------------------------------|------------------------------------------------|------------------------------------|
| <b>Supratentorial</b>          | <b>40</b>     | <b>24</b>                                    | <b>8</b>                                       | <b>4</b>                           |
| <b>Anaplastic Astrocytoma</b>  | 1             | 1                                            | 0                                              | 0                                  |
| <b>ATRT</b>                    | 3             | 3                                            | 0                                              | 0                                  |
| <b>Diffuse astrocytoma</b>     | 1             | 1                                            | 1                                              | 0                                  |
| <b>DNET</b>                    | 3             | 2                                            | 1                                              | 0                                  |
| <b>Germinoma</b>               | 1             | 0                                            | 0                                              | 0                                  |
| <b>Glioblastoma multiforme</b> | 1             | 1                                            | 0                                              | 0                                  |
| <b>Mixed germ cell tumour</b>  | 1             | 1                                            | 0                                              | 0                                  |
| <b>Meningioma</b>              | 1             | 0                                            | 0                                              | 0                                  |

|                                                                                                                                   |           |           |          |                  |
|-----------------------------------------------------------------------------------------------------------------------------------|-----------|-----------|----------|------------------|
| <b>Teratoma</b>                                                                                                                   | 2         | 2         | 0        | 0                |
| <b>Optic pathway glioma</b>                                                                                                       | 2         | 0         | 0        | 0                |
| <b>Pilocytic astrocytoma</b>                                                                                                      | 4         | 4         | 0        | 0                |
| <b>Pilomyxoid astrocytoma</b>                                                                                                     | 1         | 1         | 1        | 0                |
| <b>Pituitary macroadenoma</b>                                                                                                     | 1         | 1         | 1        | 0                |
| <b>Supratentorial PNET</b>                                                                                                        | 2         | 2         | 2        | 0                |
| <b>Supratentorial ependymoma</b>                                                                                                  | 1         | 1         | 0        | 0                |
| <b>Non-malignant:</b><br>(2=cortical dysplasia, 1=pineal<br>cyst, 1=epidermoid cyst, 6=<br>incidental lesions)                    | 10        | 2         | 0        | 0                |
| <b>Diagnosis Uncertain: (1=<br/>possible astroblastoma, 2=<br/>possible tectal plate glioma, 2=<br/>possible low grade glioma</b> | 5         | 0         | 0        | 4 (1 unbiopsied) |
| <b>Posterior Fossa</b>                                                                                                            | <b>17</b> | <b>14</b> | <b>0</b> | <b>0</b>         |
| <b>Medulloblastoma</b>                                                                                                            | 6         | 6         | 0        | 0                |

---

|                                           |           |                 |                      |                       |
|-------------------------------------------|-----------|-----------------|----------------------|-----------------------|
| <b>Ependymoma</b>                         | 1         | 1               | 0                    | 0                     |
| <b>Pilocytic Astrocytoma</b>              | 7         | 7               | 0                    | 0                     |
| <b>Non-malignant (incidental lesions)</b> | 3         | 0               | 0                    | 0                     |
| <hr/>                                     |           |                 |                      |                       |
| <b>Brainstem</b>                          | <b>7</b>  | <b>1</b>        | <b>0</b>             | <b>0</b>              |
| <hr/>                                     |           |                 |                      |                       |
| <b>DIPG</b>                               | 5         | 1               | 0                    | 0                     |
| <b>Low Grade Glioma</b>                   | 2         | 0               | 0                    | 0                     |
| <hr/>                                     |           |                 |                      |                       |
| <b>Total</b>                              | <b>64</b> | <b>39 (61%)</b> | <b>8 (8/39= 21%)</b> | <b>4 (4/39 = 10%)</b> |
| <hr/>                                     |           |                 |                      |                       |

**Supplementary Data 2: Diagnosis of CNS lesions by tumour type using MRI alone, MRI+MRS and histopathology**

| Tumour Board Diagnosis         | Number    | Total 'correct' MRI | Total 'partially correct' MRI | Total 'correct'+ 'partially correct' MRI | Total 'incorrect' or 'inconclusive' MRI | Total correct MRI+MRS | Total 'partially correct' MRI confirmed by MRS | Total 'incorrect' or 'inconclusive' MRI correctly diagnosed by MRS | MRS 'incorrect' | Change in management resulting from MRS                                                                                                                                               |
|--------------------------------|-----------|---------------------|-------------------------------|------------------------------------------|-----------------------------------------|-----------------------|------------------------------------------------|--------------------------------------------------------------------|-----------------|---------------------------------------------------------------------------------------------------------------------------------------------------------------------------------------|
| <b>Supratentorial</b>          | <b>40</b> | <b>6</b>            | <b>11</b>                     | <b>17</b>                                | <b>23</b>                               | <b>24</b>             | <b>7</b>                                       | <b>8</b>                                                           | <b>2</b>        | <b>17</b>                                                                                                                                                                             |
| <b>Anaplastic Astrocytoma</b>  | 1         | 0                   | 0                             | 0                                        | 1                                       | 0                     | 0                                              | 0                                                                  | 0               | n=1: MRS confirmed high grade lesion: guided MRT decision to aim for complete resection                                                                                               |
| <b>ATRT</b>                    | 3         | 0                   | 0                             | 0                                        | 3                                       | 0                     | 0                                              | 0                                                                  | 1 (ependymoma)  | n=1: Incorrect MRS diagnosis – did not alter management                                                                                                                               |
| <b>Diffuse astrocytoma</b>     | 1         | 0                   | 1                             | 1                                        | 0                                       | 1                     | 0                                              | 0                                                                  | 0               | n=1: MRS used to successfully guide biopsy of a heterogeneous lesion (CSI)                                                                                                            |
| <b>DNET</b>                    | 3         | 0                   | 1                             | 1                                        | 2                                       | 3                     | 1                                              | 2                                                                  | 0               | n=1: MRS suggestive of DNET (high mIns) avoided biopsy                                                                                                                                |
| <b>Germinoma</b>               | 1         | 1                   | 0                             | 1                                        | 0                                       | 1                     | 0                                              | 0                                                                  | 0               |                                                                                                                                                                                       |
| <b>Glioblastoma multiforme</b> | 1         | 0                   | 0                             | 0                                        | 1                                       | 0                     | 0                                              | 0                                                                  | 0               |                                                                                                                                                                                       |
| <b>Mixed germ cell tumour</b>  | 1         | 0                   | 1                             | 1                                        | 0                                       | 1                     | 1                                              | 0                                                                  | 0               | n=1: MRS used to answer clinical question regarding diagnosis of bifocal or metastatic disease. Bifocal disease diagnosed resulting in treatment with proton beam RT rather than CSI. |
| <b>Meningioma</b>              | 1         | 1                   | 0                             | 1                                        | 0                                       | 1                     | 0                                              | 0                                                                  | 0               |                                                                                                                                                                                       |
| <b>Teratoma</b>                | 2         | 1                   | 0                             | 1                                        | 1                                       | 2                     | 0                                              | 1                                                                  | 0               |                                                                                                                                                                                       |

|                                                                                                                     |           |          |          |           |          |           |          |          |                |                                                                                                                                                                                                                                                                            |
|---------------------------------------------------------------------------------------------------------------------|-----------|----------|----------|-----------|----------|-----------|----------|----------|----------------|----------------------------------------------------------------------------------------------------------------------------------------------------------------------------------------------------------------------------------------------------------------------------|
| <b>Optic pathway glioma</b>                                                                                         | 2         | 1        | 1        | 2         | 0        | 2         | 1        | 0        | 0              | n=1: metastatic OPG diagnosis uncertain using MRI alone. Confirmation with MRS allowed commencement of LGG protocol without biopsy.                                                                                                                                        |
| <b>Pilocytic astrocytoma</b>                                                                                        | 4         | 1        | 1        | 2         | 2        | 2         | 0        | 0        | 0              |                                                                                                                                                                                                                                                                            |
| <b>Pilomyxoid astrocytoma</b>                                                                                       | 1         | 0        | 0        | 0         | 1        | 0         | 0        | 0        | 0              |                                                                                                                                                                                                                                                                            |
| <b>Pituitary macroadenoma</b>                                                                                       | 1         | 0        | 0        | 0         | 1        | 0         | 0        | 0        | 0              |                                                                                                                                                                                                                                                                            |
| <b>Supratentorial PNET</b>                                                                                          | 2         | 0        | 1        | 1         | 1        | 1         | 0        | 0        | 1 (ependymoma) | n=1: Incorrect MRS diagnosis – did not alter management                                                                                                                                                                                                                    |
| <b>Supratentorial ependymoma</b>                                                                                    | 1         | 0        | 0        | 0         | 1        | 1         | 0        | 1        | 0              | n=1: MRS suggested ependymoma, guided surgical planning to aim for complete resection                                                                                                                                                                                      |
| <b>Non-malignant: (2=cortical dysplasia, 1=pineal cyst, 1=epidermoid cyst, 6= incidental lesions)</b>               | 10        | 1        | 5        | 6         | 4        | 9         | 4        | 4        | 0              | n=8: Confident diagnosis of benign lesions made with addition of MRS. These diagnoses were uncertain using MRI alone. Avoided biopsy in 8 patients                                                                                                                         |
| <b>Diagnosis Uncertain: (1= possible astroblastoma, 2=possible tectal plate glioma, 2=possible low grade glioma</b> | 5         | 0        | 0        | 0         | 5        | 0         |          |          |                | n=2: Unusual MRS in possible astroblastoma and possible tectal plate glioma alerted to unusual pathology. Close monitoring enabled early detection of aggressive course. n=2:MRS suggestive of low grade lesions in 2 possible low grade gliomas – MDT decision to observe |
| <b>Posterior Fossa</b>                                                                                              | <b>17</b> | <b>9</b> | <b>6</b> | <b>15</b> | <b>2</b> | <b>16</b> | <b>4</b> | <b>1</b> | <b>0</b>       | <b>2</b>                                                                                                                                                                                                                                                                   |
| <b>Medulloblastoma</b>                                                                                              | 6         | 3        | 3        | 6         | 0        | 6         | 2        | 0        | 0              | 0                                                                                                                                                                                                                                                                          |

|                                           |           |                 |                 |                 |                 |                 |                         |                         |          |                                                                                                                                                                                             |
|-------------------------------------------|-----------|-----------------|-----------------|-----------------|-----------------|-----------------|-------------------------|-------------------------|----------|---------------------------------------------------------------------------------------------------------------------------------------------------------------------------------------------|
| <b>Ependymoma</b>                         | 1         | 0               | 1               | 1               | 0               | 1               | 1                       | 0                       | 0        | n=1: Confirming ependymoma preoperatively allowed surgical planning of complete resection. Intraoperative histopathology was inconclusive in this case.                                     |
| <b>Pilocytic Astrocytoma</b>              | 7         | 6               | 1               | 7               | 0               | 7               | 1                       | 0                       | 0        |                                                                                                                                                                                             |
| <b>Non-malignant (incidental lesions)</b> | 3         | 0               | 1               | 1               | 2               | 1               | 0                       | 1                       | 0        | n=1: Avoidance of biopsy in non-malignant lesion                                                                                                                                            |
| <b>Brainstem</b>                          | <b>7</b>  | <b>3</b>        | <b>3</b>        | <b>6</b>        | <b>1</b>        | <b>7</b>        | <b>3</b>                | <b>1</b>                | <b>0</b> | <b>4</b>                                                                                                                                                                                    |
| <b>DIPG</b>                               | 5         | 3               | 2               | 5               | 0               | 5               | 2                       | 0                       | 0        | n=2: confirmation of DIPG diagnosis when MRI uncertain, allowed family discussions and referral to RT                                                                                       |
| <b>Low Grade Glioma</b>                   | 2         | 0               | 1               | 1               | 1               | 2               | 1                       | 1                       | 0        | n=2: Atypical MRS profile of pontine lesions alerted clinicians to diagnosis of LGG rather than DIPG. No radiotherapy given.<br>n=1 observed (stable), n=1 treated on LGG protocol (stable) |
| <b>Total</b>                              | <b>64</b> | <b>18 (28%)</b> | <b>20 (31%)</b> | <b>38 (59%)</b> | <b>26 (41%)</b> | <b>47 (73%)</b> | <b>14 (14/38 = 37%)</b> | <b>10 (10/26 = 38%)</b> | <b>2</b> | <b>23 (36%)</b>                                                                                                                                                                             |

**Supplementary Data 3: Diagnosis of CNS lesions managed without histopathology**

| <b>Reason for lack of histopathological diagnosis</b> | <b>Tumour Location</b>                                       | <b>Tumour Board Diagnosis</b>                                                | <b>Diagnosis facilitated by MRS</b>                                                                                                                                 | <b>Initial diagnosis modified by MRS</b>                                                                 | <b>Management changed by MRS</b>                                                                                                                                                       |
|-------------------------------------------------------|--------------------------------------------------------------|------------------------------------------------------------------------------|---------------------------------------------------------------------------------------------------------------------------------------------------------------------|----------------------------------------------------------------------------------------------------------|----------------------------------------------------------------------------------------------------------------------------------------------------------------------------------------|
| <b>Unbiopsied n=21 (33% all patients)</b>             | Supratentorial n=14;<br>Posterior fossa n=1<br>Brainstem n=6 | Indolent lesions n=11<br>(incidental lesions n=9,<br>cortical dysplasia n=2) | n=9 indolent lesions<br>MRS confirmed non-malignancy                                                                                                                | n=9 confirmed diagnosis:<br>conventional MRI diagnosis uncertain                                         | n=9 confident MRS diagnosis of non-tumour avoided biopsy in indolent lesions                                                                                                           |
|                                                       |                                                              | Optic pathway glioma n=2                                                     | n=2 indolent lesions<br>MRS unavailable –<br>decision for conservative management based on conventional imaging<br>n=1: Confirmed optic pathway glioma (metastatic) | n=1 confirmed diagnosis:<br>conventional MRI diagnosis uncertain                                         | n=1: Avoided biopsy in metastatic optic pathway glioma in patient with multiple comorbidities.                                                                                         |
|                                                       |                                                              | DNET n=1                                                                     | n=1: Confirmed DNET (high mIns)                                                                                                                                     | n=1 confirmed diagnosis:<br>conventional MRI diagnosis uncertain                                         |                                                                                                                                                                                        |
|                                                       |                                                              | Germinoma n=1                                                                | MRS diagnosis not documented                                                                                                                                        |                                                                                                          |                                                                                                                                                                                        |
|                                                       |                                                              | DIPG n=4                                                                     | n=2: Confirmed DIPG (conventional MRI diagnosis uncertain)                                                                                                          | n=2 confirmed diagnosis:<br>conventional MRI diagnosis uncertain                                         |                                                                                                                                                                                        |
|                                                       |                                                              | Low grade glioma n = 2                                                       | n=2: Confirmed low grade glioma                                                                                                                                     | n=1 confirmed diagnosis:<br>conventional MRI diagnosis uncertain                                         |                                                                                                                                                                                        |
|                                                       |                                                              |                                                                              |                                                                                                                                                                     | n=1 Re-diagnosis. Pontine lesion misdiagnosed as DIPG by MRI reclassified as LGG following MRS. Atypical | n=1: pontine lesion misdiagnosed as DIPG using MRI alone was reclassified as LGG following MRS. The child was treated on the LGG protocol and remains stable 16months after diagnosis. |

|                                                            |                    |                                                                                                   |                                                                                                                                                                                                          |                                                                                                                                                                                                                                                                                                                                                                                                                                                                                                                                                                                 |                                                                                                                                                                                                                                                                                                                                          |
|------------------------------------------------------------|--------------------|---------------------------------------------------------------------------------------------------|----------------------------------------------------------------------------------------------------------------------------------------------------------------------------------------------------------|---------------------------------------------------------------------------------------------------------------------------------------------------------------------------------------------------------------------------------------------------------------------------------------------------------------------------------------------------------------------------------------------------------------------------------------------------------------------------------------------------------------------------------------------------------------------------------|------------------------------------------------------------------------------------------------------------------------------------------------------------------------------------------------------------------------------------------------------------------------------------------------------------------------------------------|
| <b>Inconclusive histopathology n = 4 (6% all patients)</b> | Supratentorial n=4 | Possible tectal plate glioma n=2;<br>Possible astroblastoma n=1;<br>Possible low grade glioma n=1 | n=1: Alerted to high grade tumour (possible astroblastoma) in lesion initially thought low grade on conventional MRI and histopathology<br>n=1: Confirmed low grade glioma where MRI diagnosis uncertain | MRS profile was suggestive of LGG. Diagnosis of LGG was verified through clinical course.<br><br>n=2 Unusual MRS profiles alerted clinicians to unusual tumour types.<br>n=1: MRI diagnosis of tectal plate glioma. Histopathology inconclusive. Atypical MRS profile indicated tectal plate glioma unlikely.<br>n=1: MRI diagnosis of tectal plate glioma. Histopathology inconclusive (possible low grade glioma.: Central review possible astroblastoma). MRS profile not typical of tectal plate or low grade glioma alerting clinicians to unusual high grade tumour type. | n=1: MRI diagnosis tectal plate glioma. Atypical MRS profile resulted in close observation and early detection of increase in size.<br>n=1: MRI diagnosis tectal plate glioma. MRS profile unusual alerting clinicians to unusual tumour type. Close monitoring enabled early detection of rapid increase in size and metastatic spread. |
| <b>Total n=25 (39% all patients)</b>                       |                    | <b>21 (21/25 = 84%) (consensus TB diagnosis)</b>                                                  | <b>17 (17/25 = 68%) (MRS facilitated diagnosis)</b>                                                                                                                                                      | <b>3 (3/25 = 12%) (MRS modified diagnosis)</b>                                                                                                                                                                                                                                                                                                                                                                                                                                                                                                                                  | <b>13 (13/25 = 52%) (MRS altered management)</b>                                                                                                                                                                                                                                                                                         |



#### Supplementary Data 4: Diagnosis of CNS lesions managed without histopathology

|                                                  | Percentage (number) | Notes                                                                                                                                                                                                                                    |
|--------------------------------------------------|---------------------|------------------------------------------------------------------------------------------------------------------------------------------------------------------------------------------------------------------------------------------|
| <b>Number of patients without histopathology</b> | 39% (25)            |                                                                                                                                                                                                                                          |
| <b>TB consensus diagnosis reached</b>            | 84% (21)            | Diagnostic uncertainty: 16% (4)                                                                                                                                                                                                          |
| <b>MRS contributed to TB diagnosis</b>           | 68% (17)            | MRS modified diagnosis: 12% (3)                                                                                                                                                                                                          |
| <b>MRS influenced management</b>                 | 52% (13)            | <ul style="list-style-type: none"><li>• Avoiding biopsy (10)</li><li>• Revision of diagnosis with subsequent appropriate management (1)</li><li>• Alerting to high-grade behaviour of lesions initially thought low grade (2).</li></ul> |

**Supplementary Data 5: Diagnosis of indolent lesions**

|                                                              | <b>Number</b>                          | <b>Percentage</b>                               |
|--------------------------------------------------------------|----------------------------------------|-------------------------------------------------|
| <b>Number of indolent lesions</b>                            | 13                                     | 20% total                                       |
|                                                              | (Supratentorial 10; Posterior Fossa 3) |                                                 |
| <b>Indolent lesions diagnosed non-invasively</b>             | 11                                     | 85%                                             |
| <b>Indolent lesions diagnosed following MRI alone</b>        | 6                                      | 46%                                             |
|                                                              | (all 'partially correct')              |                                                 |
| <b>Indolent lesions diagnosed following MRI+MRS</b>          | 10                                     | 77%                                             |
| <b>Malignant lesions misclassified as indolent using MRS</b> | 0                                      | 0                                               |
| <b>Indolent lesions biopsied</b>                             | 2                                      | 15%                                             |
|                                                              | (AV malformation; epidermoid cyst)     |                                                 |
| <b>Management changed by MRS</b>                             | 10 (avoided biopsy)                    | 10/11 unbiopsied                                |
|                                                              |                                        | = 91% noninvasive diagnoses confirmed using MRS |
